# Supplementary material for: Behavioral Weight Management Interventions for Hispanic Men in the United States: A Systematic Review
Source: PubMed Central journal article supplement — Am J Mens Health. 2024 Oct 28;18(5):15579883241290344. doi: 10.1177/15579883241290344 (PMC11528914; doi:10.1177/15579883241290344), 2024-10-28
Supplement: sj-pdf-3-jmh-10.1177_15579883241290344.pdf [file sj-pdf-3-jmh-10.1177_15579883241290344.pdf]

**Supplementary Table 2: Inclusion and Exclusion Criteria**

| Inclusion Criteria                                                                                                                                                                                                                                                                                                                                                                                                                                                                                                                                                                                                                                                                                                                                                                                                                                                                                                                                    | Exclusion Criteria                                                                                                                                                                                                                                                                                                                                                                                                                                                                                                                                                                                                                                                 |
|-------------------------------------------------------------------------------------------------------------------------------------------------------------------------------------------------------------------------------------------------------------------------------------------------------------------------------------------------------------------------------------------------------------------------------------------------------------------------------------------------------------------------------------------------------------------------------------------------------------------------------------------------------------------------------------------------------------------------------------------------------------------------------------------------------------------------------------------------------------------------------------------------------------------------------------------------------|--------------------------------------------------------------------------------------------------------------------------------------------------------------------------------------------------------------------------------------------------------------------------------------------------------------------------------------------------------------------------------------------------------------------------------------------------------------------------------------------------------------------------------------------------------------------------------------------------------------------------------------------------------------------|
| <p>1. Study evaluates a behavioral or lifestyle intervention with the goal of weight management or weight prevention.</p> <ul style="list-style-type: none"><li>• If the study evaluates prevention of diabetes mellitus 2, NAFLD, or another chronic disease, it must also include a measure of weight outcomes.</li></ul> <p>2. Outcomes evaluate effectiveness of weight management and/or tailoring of intervention.</p> <p>3. Study population includes Hispanic adult (&gt;18 year old) males living in the United States.</p> <ul style="list-style-type: none"><li>• Studies including both men and women have separate data pools organized by participant's sex.</li><li>• Studies including both adult men and participants younger than 18 years of age have separate data pools organized by age.</li><li>• Populations with prediabetes or metabolic syndrome may be included as these terms designate only risk for disease.</li></ul> | <p>1. Study includes the use of pharmacologic or surgical intervention without a comparator group undergoing behavioral or lifestyle intervention.</p> <p>2. Study includes intervention to specifically manage diabetes mellitus 2 and not weight, such as medication management or adherence.</p> <p>3. Study is conducted on a special subset of the target population (e.g. only individuals with an existing health condition such as diabetes mellitus 2, cancer, or NAFLD)</p> <p>4. Study is published in a language other than English.</p> <p>5. Study results were presented in a conference abstract, textbook chapter, or unpublished manuscript.</p> |
