# Supplementary material for: Behavioral Weight Management Interventions for Hispanic Men in the United States: A Systematic Review
Source: PubMed Central journal article supplement — Am J Mens Health. 2024 Oct 28;18(5):15579883241290344. doi: 10.1177/15579883241290344 (PMC11528914; doi:10.1177/15579883241290344), 2024-10-28
Supplement: sj-pdf-4-jmh-10.1177_15579883241290344.pdf [file sj-pdf-4-jmh-10.1177_15579883241290344.pdf]

### Supplementary Table 3: The Ecological Validity Framework

Adapted from Garcia, 2018 and Bernal & Sáez-Santiago, 2006.

| <b>Dimension of Tailoring</b> | <b>Description</b>                                                                                                                                                                                                  |
|-------------------------------|---------------------------------------------------------------------------------------------------------------------------------------------------------------------------------------------------------------------|
| Language                      | Treatment delivered in preferred language of the target population                                                                                                                                                  |
| Persons                       | Matching ethnicity and gender of research personnel to those of the target population                                                                                                                               |
| Metaphors                     | Including objects and symbols relevant to the target population in the environment where the intervention is delivered, or delivering the intervention in a culturally significant space (church, community center) |
| Content                       | Integrating values, customs, and traditions important to the target population into communication (emails, flyers) and intervention materials (informational pamphlets)                                             |
| Concepts                      | Considering how different cultures and genders understand physical, behavioral, and social problems when presenting information                                                                                     |
| Goals                         | Goals of programs align with values, customs, and traditions of the target population                                                                                                                               |
| Methods                       | Implementing techniques to facilitate participation in the intervention which respect cultural or gender norms of the target population                                                                             |
| Context                       | Addressing participant's broader social, economic, and political context                                                                                                                                            |
